# Supplementary material for: Characterization of human stem cell-derived hepatic stellate cells and liver sinusoidal endothelial cells during extended in vitro culture
Source: PubMed Central journal article supplement (PMC10408301; doi:10.3389/fbioe.2023.1223737), 2023-07-25

## Supplementary Information

### Document S1: Figures S1-S8

## Characterization of Human Stem Cell-Derived Hepatic Stellate Cells and Liver Sinusoidal Endothelial Cells During Extended *in vitro* Culture

*Ingrid Wilhelmsen*<sup>1,2\*</sup>, *Mikel Amirola Martinez*<sup>2\*</sup>, *Justyna Stokowiec*<sup>2</sup>, *Chencheng Wang*<sup>2</sup>, *Aleksandra Aizenshtadt*<sup>2\*\*</sup>, *Stefan Krauss*<sup>1,2\*\*</sup>

<sup>1</sup> Department of Immunology and Transfusion Medicine, Oslo University Hospital, Oslo, Norway.

<sup>2</sup> Hybrid Technology Hub - Centre of Excellence, Institute of Basic Medical Sciences, University of Oslo, Oslo, Norway.

\*shared first authorship, \*\*shared senior authorship

## Supplementary figure legends

### Figure S1. (Related to Figure 1). Characterization of scHSCs.

- (A) Representative bright-field images of scHSCs. Scale bars: 100  $\mu\text{m}$ .
- (B) Representative immunofluorescence confocal images of PDGFR- $\beta$ , Vimentin, and NCAM1 in scHSCs. Scale bars: 40  $\mu\text{m}$ .
- (C) Representative graphs of flow cytometry analysis of surface marker PDGFR- $\beta$  in scHSCs. AB: Antibody. N = 2 technical replicates.
- (D) Representative immunofluorescence confocal images of PDGFR- $\beta$ ,  $\alpha$ -SMA, and COL1 $\alpha$ 1 in scHSCs either treated or not treated with TGF- $\beta$ . Scale bars: 40  $\mu\text{m}$ .
- (E) Representative bright-field and UV images of scHSCs either treated or not treated with TGF- $\beta$ . Scale bars: 100  $\mu\text{m}$ .
- (F) Vitamin A storage of scHSCs indirectly measured by quantifying UV positivity, comparing cells either treated or not treated with TGF- $\beta$ . N = 3 technical replicates.

### Figure S2. (Related to Figures 2, 4, and 5). Characterization of scLSECs and scLSEC flow cytometry data.

- (A) Representative bright-field images of cells differentiating from PSCs to scLSEC and pLSECs. Dark round circumferences in the “Expansion Passage 1” images correspond to residual Dyna beads used for cell-sorting of CD36+ cells. The length of the scale bars is specified in the individual images.
- (B) Representative graphs of flow cytometry analysis of LYVE1 and *E.coli* bioparticles as well as VE-cadherin and AcLDL in scLSECs. Green: HUVEC controls, red: scLSEC on day 0 (the start of the long-term culture), blue: scLSECs on day 14 of the long-term culture, yellow: scLSECs treated with DAPT on day 14 of the long-term culture. N = 3 technical replicates.

### Figure S3. (Related to Figure 3). Gene expression of scHSCs and pHSCs during long-term culture.

- (A) Gene expression analysis of HSC markers (*ALCAM*, *DESMIN*, *LRAT*, *NCAM1*, *PDGFR- $\beta$* ), fibrosis markers (*ACTA2*, *COL1 $\alpha$ 1*, *LOXL2*, *SMAD7*, *TIMP1*), and zonation markers (zone 1: *IGFBP3*, *NGFR*, *RGS4*, *TAGLN*; zone 2: *ADAMTSL2*, *PODN*, *RSPO3*, *SPON2*). Expression values were normalized to day 0 of the long-term culture. N = 3 technical replicates.

### Figure S4. (Related to Figure 3). Characterization of scHSCs and pHSCs during long-term culture.

- (A) Representative bright-field images of scHSCs and pHSCs during the long-term culture either treated or not treated with TGF- $\beta$ . Scale bars: 100  $\mu\text{m}$ .
- (B) Representative bright-field images after histochemical senescence staining of scHSCs on day 14 (stains  $\beta$ -galactosidase blue, which is detectable in senescent cells). Scale bars: 100  $\mu\text{m}$ .

- (C) Representative bright-field and UV images of scHSCs and pHSC on day 5 either treated or not treated with TGF- $\beta$ . Scale bars: 100  $\mu$ m.
- (D) Representative immunofluorescence confocal images of PDGFR- $\beta$ ,  $\alpha$ -SMA, and COL1 $\alpha$ 1 in scHSCs on days 5 and 14. scHSCs were either treated or not treated with TGF- $\beta$ . Scale bars: 40  $\mu$ m.

**Figure S5. (Related to Figure 4). Characterization of scLSECs during long-term culture.**

- (A) Relative gene expression levels of LSEC markers (*LYVE1*, *ICAM1*, *F8*, *PECAM1*, *PLVAP*, *CD36*), fibrosis markers (*CD34*, *COL5 $\alpha$ 2*, and *FBN1*), zone 1 (*Dll4*, *EphB2*, *NTN4*, *LTBP4*, and *MSR1*) and zone 3 (*KIT*, *CDH13*, and *THBD*) in scLSEC\_1 and scLSEC\_2. Expression levels were measured on days 0, 5, and 14. Values of expression were normalized to day 0 values. N = 3 technical replicates.
- (B) Representative bright-field images of scLSECs at the start (day 0) and the end (day 14) of the long-term culture. Scale bars: 100  $\mu$ m.
- (C) Representative immunofluorescence confocal images of LYVE1 and VE-cadherin in scLSEC\_1 on days 5 and 14. Scale bars: 20  $\mu$ m.

**Figure S6. (Related to Figure 5). Characterization of the effect of Notch inhibition on scHSCs and scLSECs.**

- (A) Gene expression of Notch signaling pathway-associated genes *JAG1*, *HEY1*, and *HES1* in scHSCs and scLSECs grown in untreated medium and medium supplemented with DAPT. The samples were harvested on day 14 and expression values were normalized to the untreated samples. For scHSCs: n = 4 independent differentiations of four different PSC lines with 3 technical replicates per differentiation, for scLSECs: n = 2 independent differentiations of two different PSC lines with N = 3 technical replicates per differentiation. All technical replicates are shown.
- (B) Gene expression of fibrosis-associated markers after treatment with TGF- $\beta$  in pHSCs. Expression values were normalized to the control samples. N = 3 technical replicates.
- (C) Vitamin A storage of scHSCs indirectly measured by quantifying UV positivity, comparing cells grown in untreated medium and medium supplemented with DAPT. N = 3 technical replicates.
- (D) Representative senescence-stained images of scHSCs and quantification of the senescence signal on day 14 (stains  $\beta$ -galactosidase blue, which is detectable in senescent cells). Scale bars: 100  $\mu$ m. n = 3 independent differentiations, N = 3 technical replicates per differentiation. All data points are shown
- (E) Representative bright-field images of scLSECs grown in untreated medium and medium supplemented with DAPT on day 14 of the culture, the latter group showing branch-like condensations. Scale bars: 100  $\mu$ m.

Data from scHSC\_1 and scLSEC\_1 (hESC-derived) are colored purple or shown as purple dots throughout the figure.

**Figure S7. (Related to Figure 5). Immunofluorescence images of scHSCs and pHSCs under Notch Inhibition.**

- (A) Representative immunofluorescence confocal images of PDGFR- $\beta$ ,  $\alpha$ -SMA, and COL1 $\alpha$ 1 in scHSCs and pHSCs. The cells were grown in a medium supplemented with DAPT and a pro-fibrotic stimulus was induced by TGF- $\beta$ . Scale bars: 40  $\mu$ m.
- (B) Representative immunofluorescence confocal images of LYVE1 and VE-cadherin in scLSEC\_2 grown in untreated medium and medium supplemented with DAPT on day 14 of the culture. Scale bars: 20  $\mu$ m.

**Figure S8. (Related to Figure 6). Co-culture of scHSCs and scLSECs.**

- (A) Gene expression profile of scHSCs and scLSECs grown in co-culture for 14 days, testing HSC markers (*ALCAM*, *DESMIN*, *LRAT*, *NCAM1*, *PDGFR- $\beta$* ), HSC fibrosis markers (*ACTA2*, *COL1 $\alpha$ 1*, *LOXL2*, *SMAD7*, *TIMP1*) and HSC zonation markers (zone 1: *IGFBP3*, *NGFR*, *RGS4*, *TAGLN*; zone 2: *ADAMTSL2*, *PODN*, *RSPO3*, *SPON2*), LSEC markers (*CD36*, *F8*, *LYVE1*, *PLVAP*), LSEC fibrosis markers (*COL5 $\alpha$ 2*, *FBN1*, *CD34*), and LSEC zonation markers (zone 1: *DLL4*; zone 3: *CDH13*). N = 3 technical replicates.
- (B) Comparing vitamin A storage measured by UV signal in scHSCs grown in monoculture either with HSC expansion medium or HSC-LSEC co-culture medium for 14 days (see table 2 for medium compositions). N = 3 technical replicates, each replicate is the average of 5 independent fields.

# S1

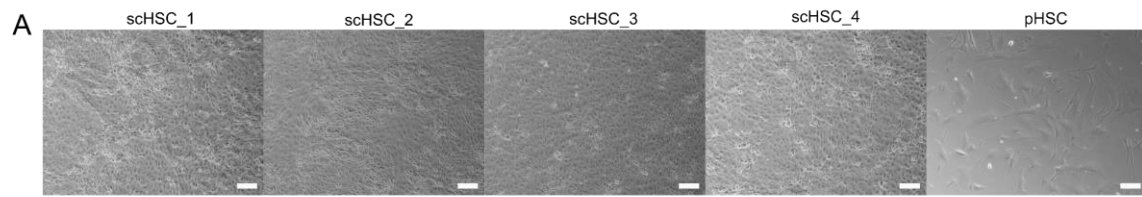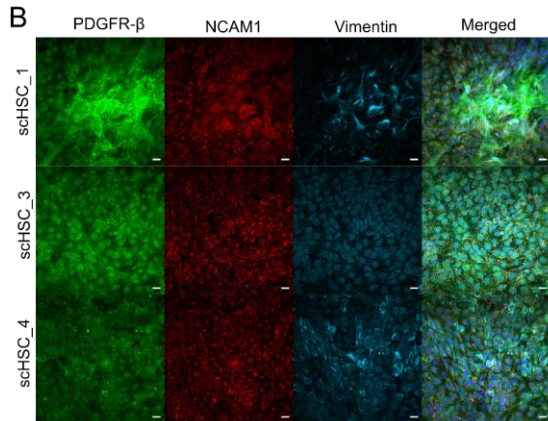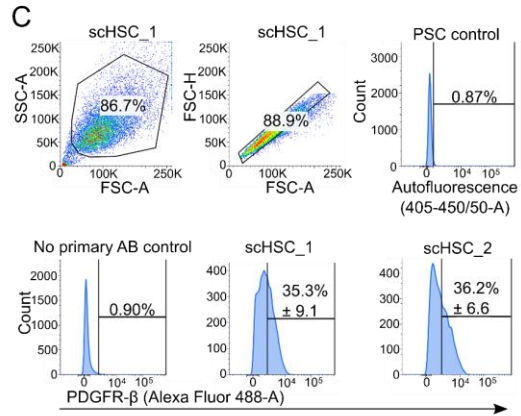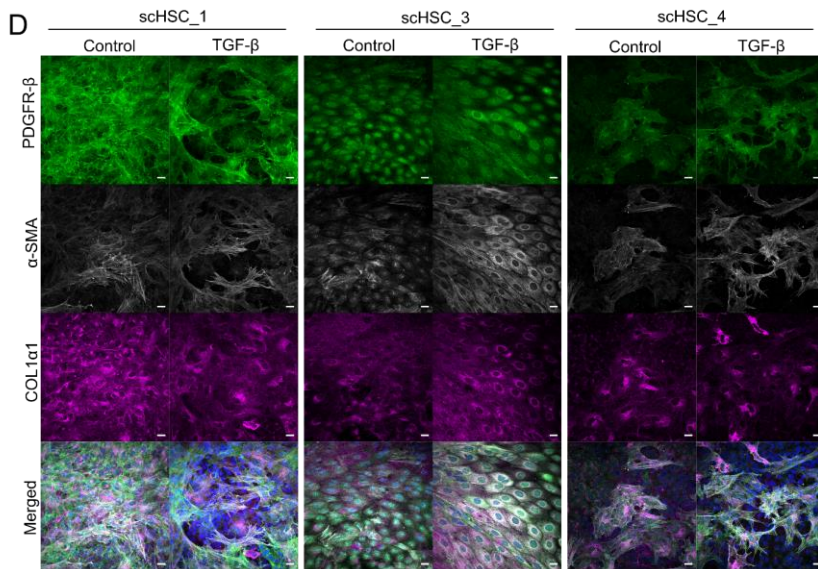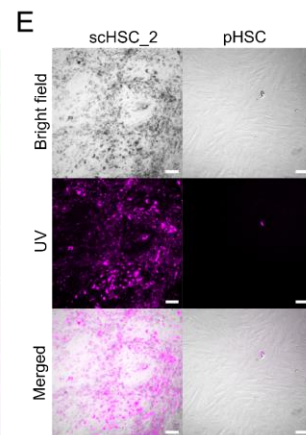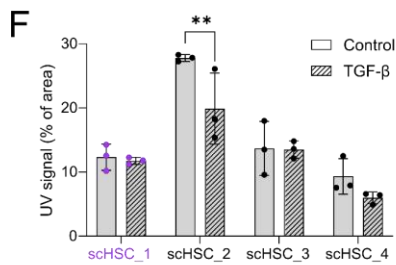

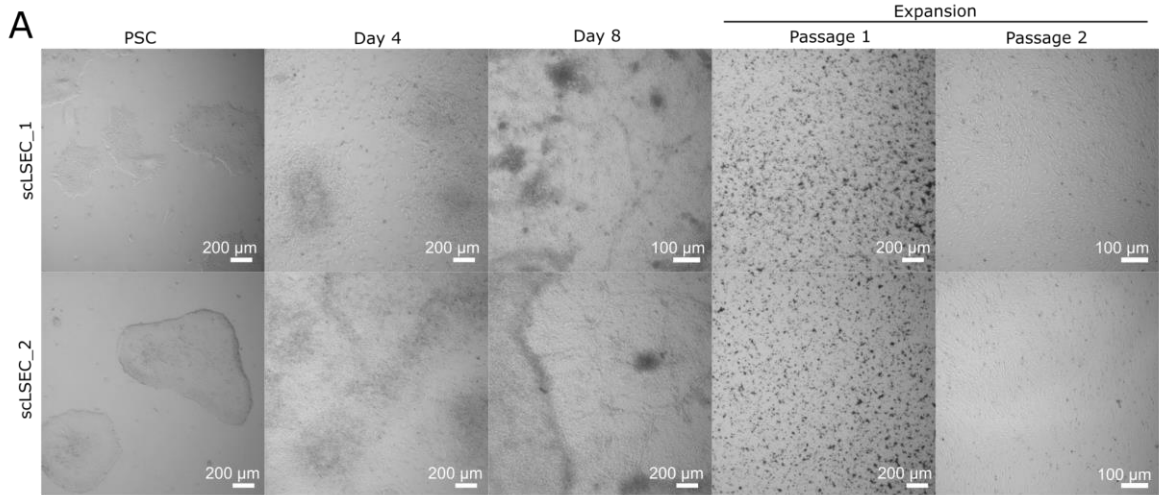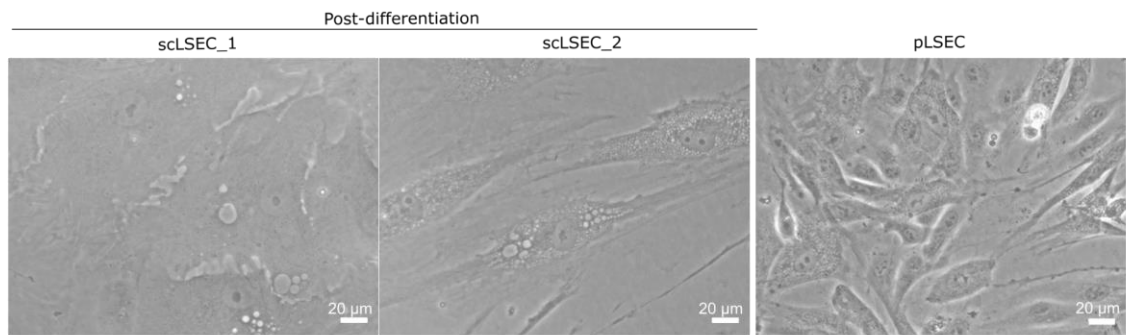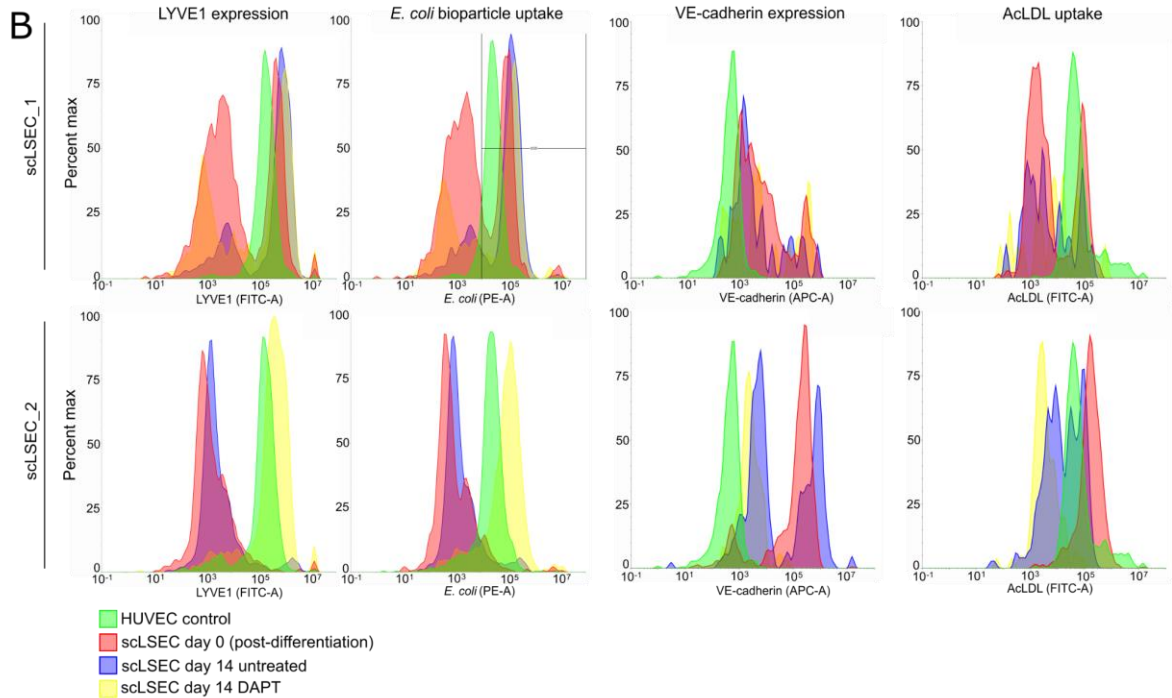

A

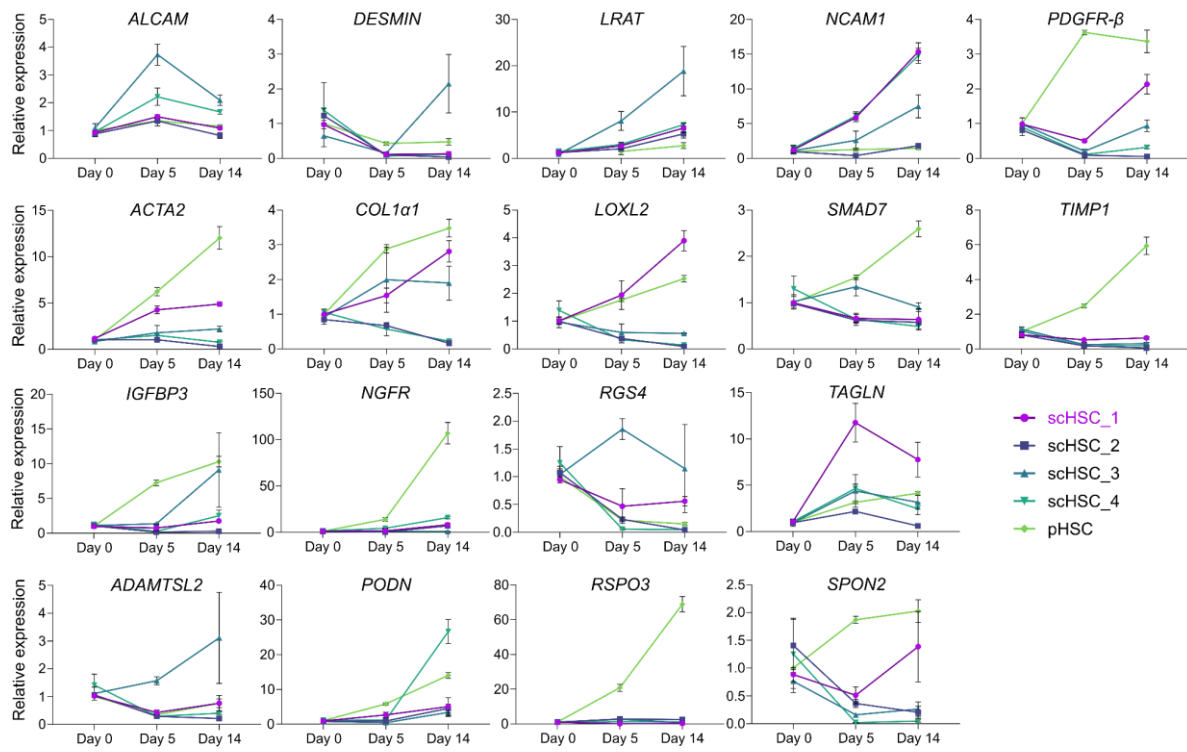

S4

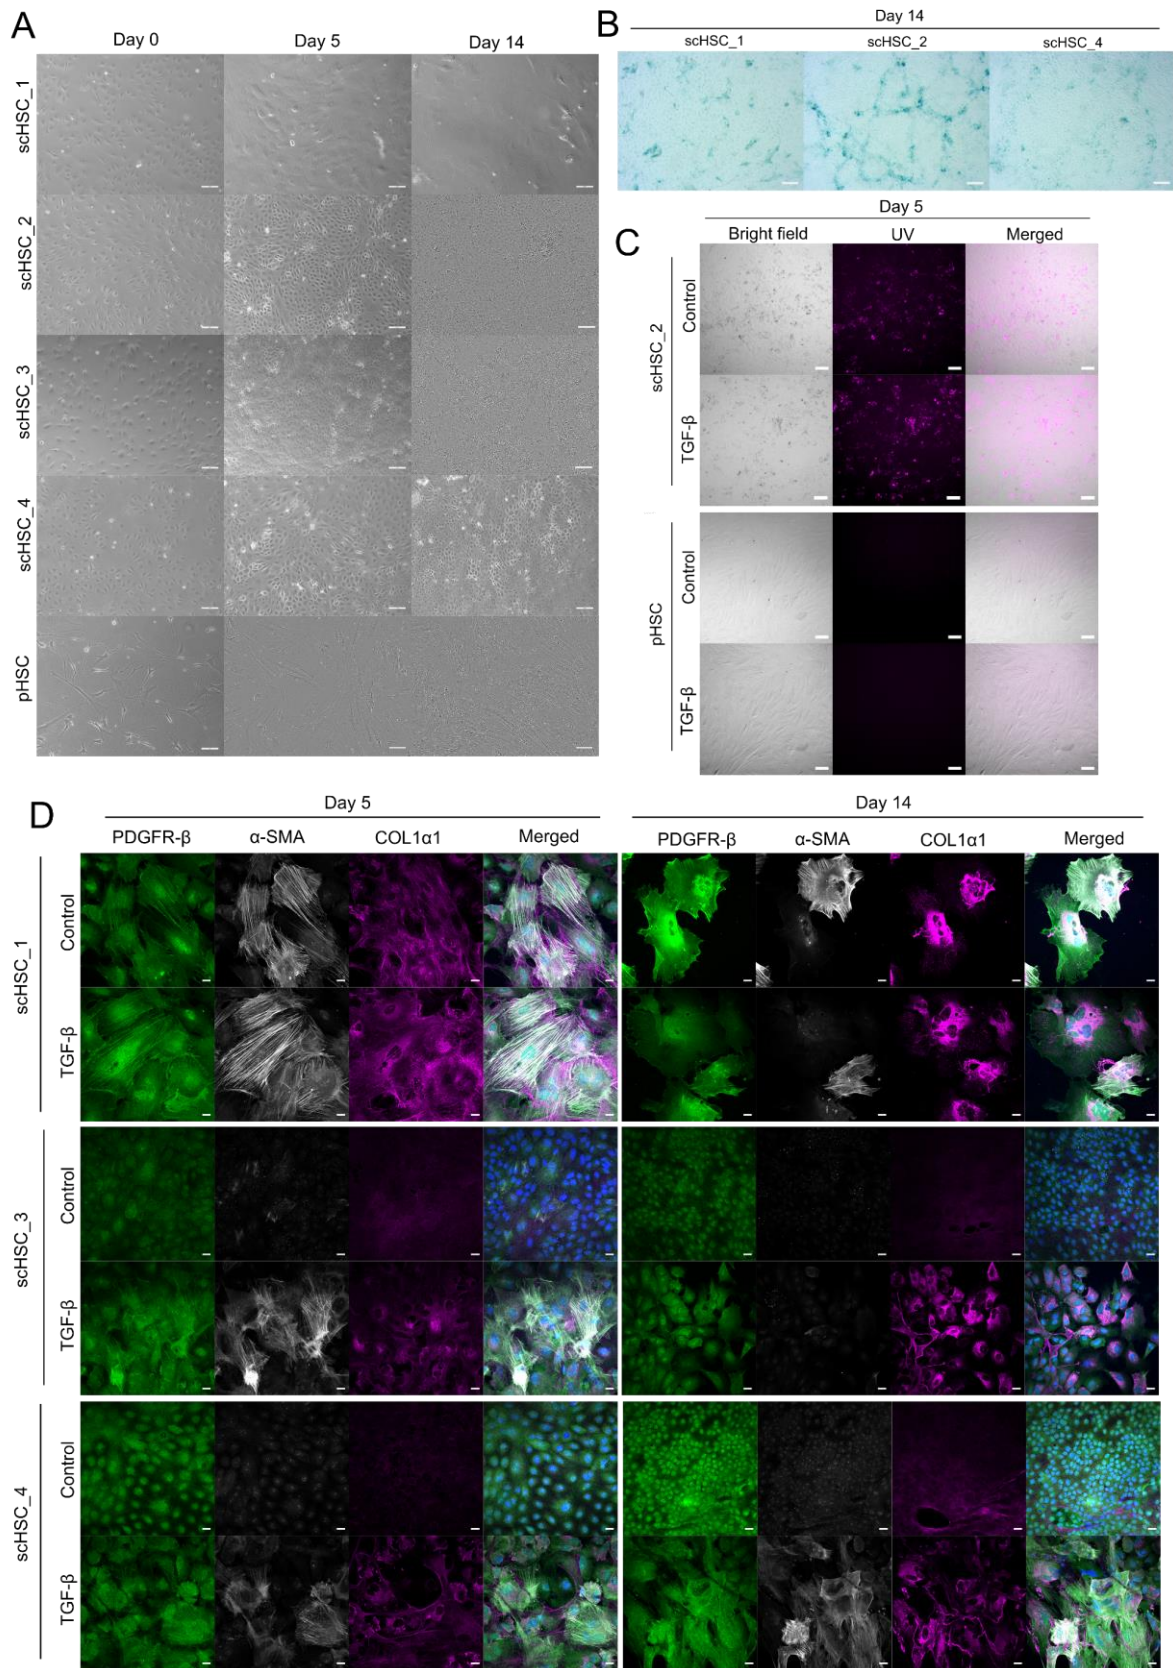



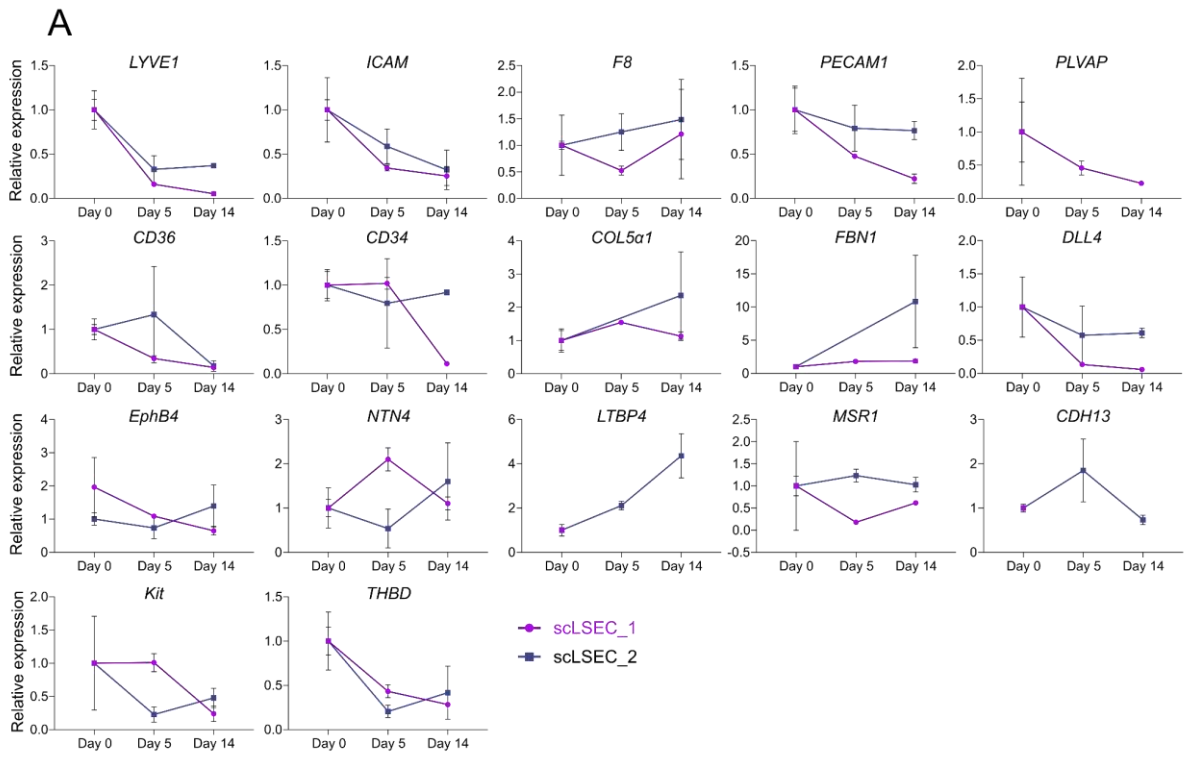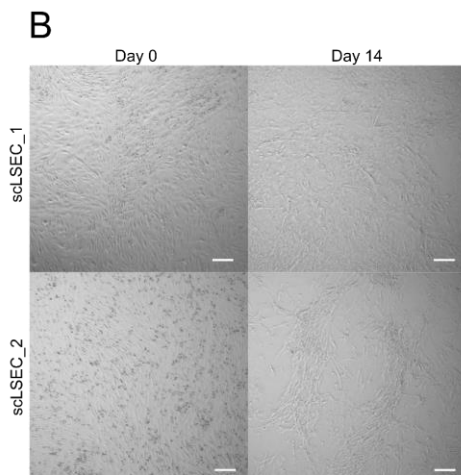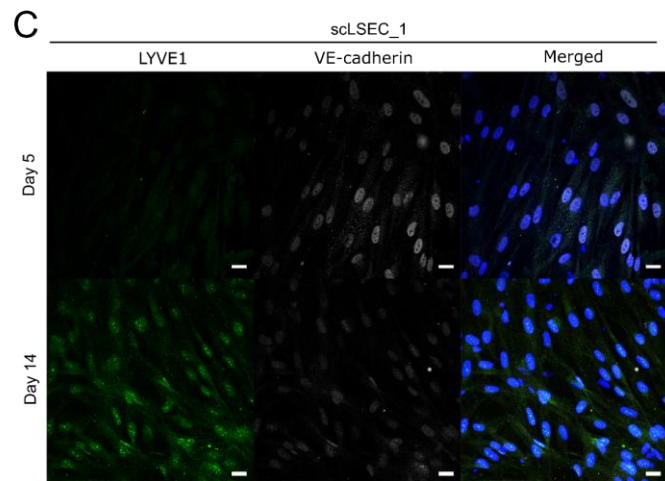

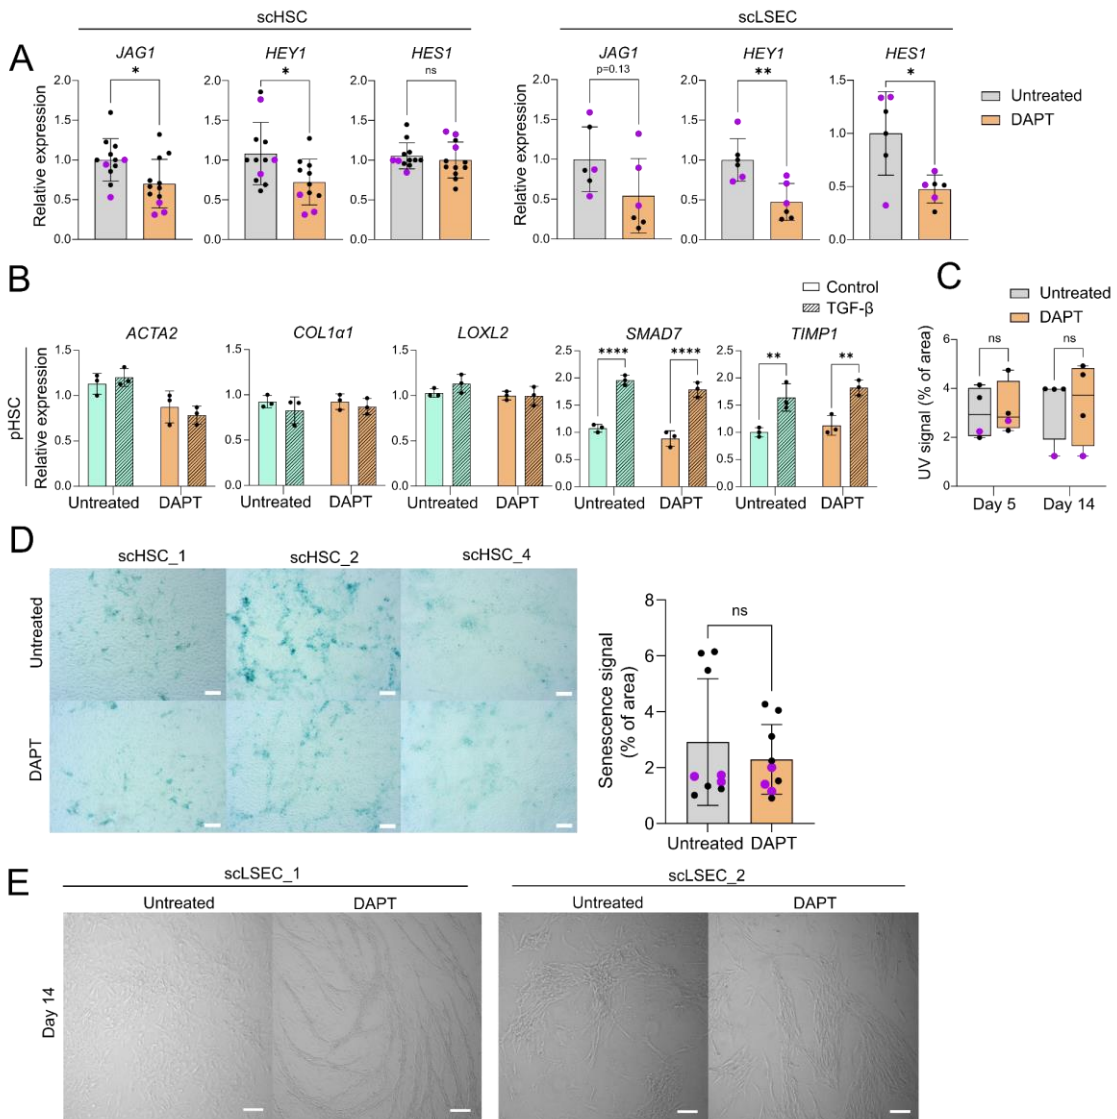

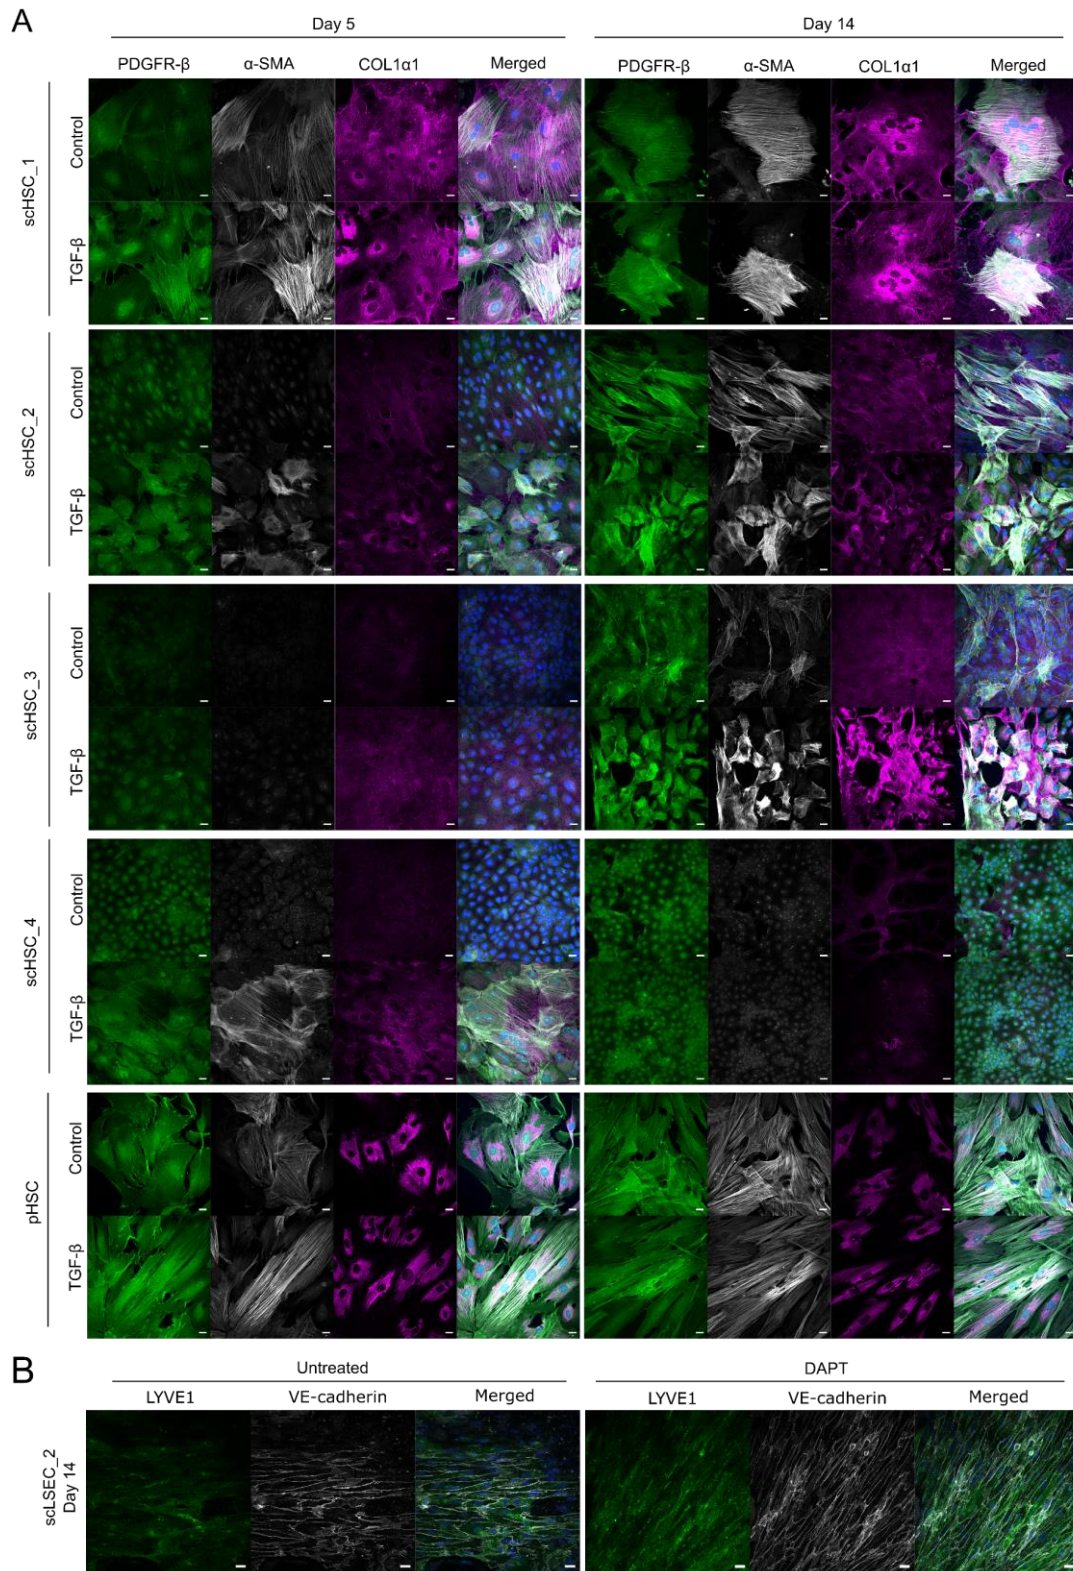

A

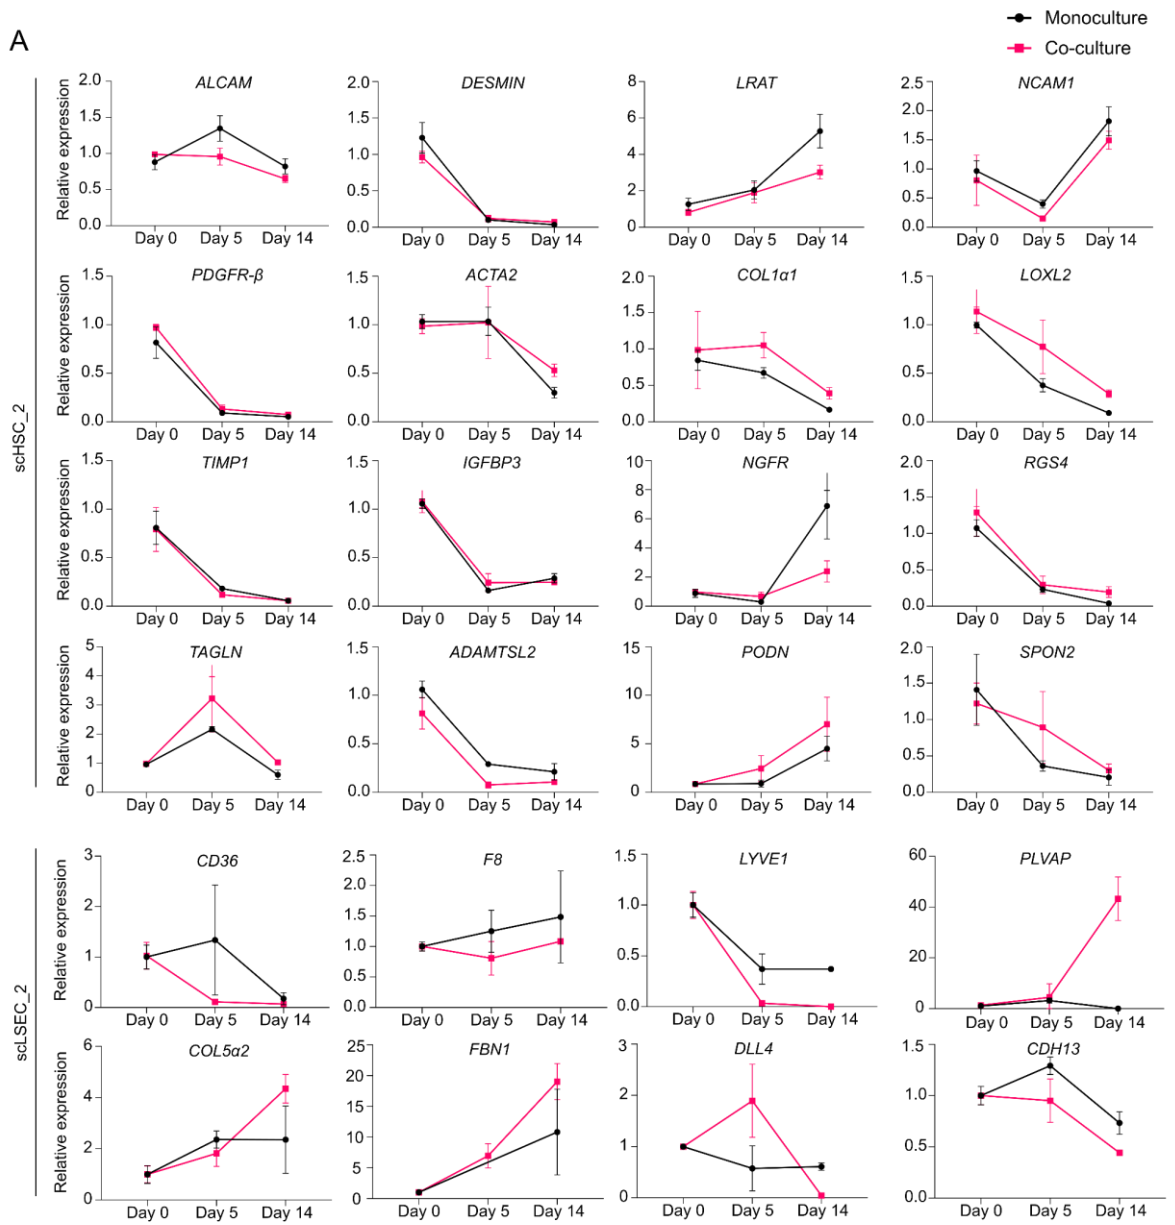

B

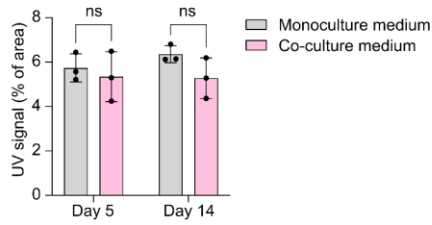

Supplement: DataSheet1.pdf [file DataSheet1.pdf]
