# Supplementary material for: Characterization of human stem cell-derived hepatic stellate cells and liver sinusoidal endothelial cells during extended in vitro culture
Source: Front Bioeng Biotechnol. 2023 Jul 25;11:1223737. doi: 10.3389/fbioe.2023.1223737 (PMC10408301; doi:10.3389/fbioe.2023.1223737)
Supplement: Supplementary file 3 [file Table3.XLSX]

## Sheet: Materials
Materials list
Antibodies
Product	Host	Source	Reference number	Lot number	Dilution
Primary
Human PDGF R beta Antibody	Goat	R&D Systems	AF385	BIW0621011	1:50
Recombinant Anti-NCAM1 antibody [EP2567Y] (ab75813)	Rabbit	Abcam	ab75813	GR3283928-1	1:100
Anti-Vimentin antibody [RV202] - Cytoskeleton Marker (ab8978)	Mouse	Abcam	ab8978	GR3323360-3	1:200
Anti Ve-Cadherin	Rabbit	Abcam	ab33168		1:500
Monoclonal Anti-Actin, α-Smooth Muscle	Mouse	Sigma-Aldrich	A2547-100UL	0000141512	1:400
anti LYVE1	Goat	R&D Systems	AF2089-SP		1:40
Anti-COL1A1 antibody produced in rabbit	Mouse	Sigma-Aldrich	HPA011795	16030	1:400
Non-phospho (Active) β-Catenin (Ser33/37/Thr41) (D13A1) Rabbit mAb #8814	Rabbit	Cell Signaling Technology	8814		1:800
Secondary
Alexa Fluor® 488 AffiniPure Donkey Anti-Goat IgG (H+L)	-	Jackson ImmunoResearch	705-545-147	143223	1:300
Alexa Fluor® 647 AffiniPure Donkey Anti-Mouse IgG (H+L)	-	Jackson ImmunoResearch	715-605-150		1:300
Cy™3 AffiniPure Donkey Anti-Rabbit IgG (H+L)	-	Jackson ImmunoResearch	711-165-152		1:300
Nuclear staining
DAPI (4',6-Diamidino-2-Phenylindole, Dihydrochloride)	-	Thermo Fisher Scientific	D1306		1:500
Chemicals, Peptides and Recombinant Proteins
Product	Source	Reference number	Lot number
CHIR 99021	Tocris	4423
Recombinant Human/Murine/Rat Activin A (CHO derived)	Peprotech	120-14P
Recombinant Human BMP-4 (HeLa derived)	Peprotech	120-05	1021346
Recombinant Human FGF-3 Protein	R&D Systems	1206-F3-025	IAB0621051
Recombinant Human FGF-acidic (FGF-1)	Peprotech	100-17A	61507
Retinol	Sigma-Aldrich	R7632	BCCF5585
Palmitic acid	Sigma-Aldrich	P5585
DAPT	Tocris	2634	10A/263382
Recombinant human TGF beta 1 protein (Active) (ab50036)	Abcam	ab50036	GR3408214-4
Dexamethasone	Sigma-Aldrich	D4902-100 mg
Insulin-Transferrin-Selenium (ITS -X) (100X)	Thermo Fisher Scientific
Insulin-Transferrin-Selenium (ITS -G) (100X)	Thermo Fisher Scientific	41400045	2423499
2-Phospho-L-ascorbic acid trisodium salt	Sigma-Aldrich	49752
Animal-Free Recombinant Human VEGF165	Peprotech	AF-100-20
Animal-Free Recombinant Human FGF-basic (154 a.a.)	Peprotech	AF-100-18B
8 Br-cAMP	Biolog (Germany)	B 007-500
Recombinant Human Transferrin	Peprotech	10-366-1g
Sb431912	Sigma Aldrich	616461-5MG
Fetal Bovine Serum, qualified	Thermo Fisher Scientific	26140079
B-27™ Supplement (50X), serum free	Thermo Fisher Scientific	17504044	231348
MEM Non-Essential Amino Acids Solution (100X)	Thermo Fisher Scientific	11140050
IMDM	Life technologies AS	12440046
Triton™ X-100	Sigma-Aldrich	X100-5ML
Paraformaldehyde	Sigma-Aldrich	158127-500G	#STBH1064
Trypsin-EDTA solution	Sigma-Aldrich	T4049-100ML
StemPro™ Accutase™ Cell Dissociation Reagent	Thermo Fisher Scientific	A1110501
DPBS, no calcium, no magnesium	Thermo Fisher Scientific	14190-169
Gibco™ Geltrex™ LDEV-Free, hESC-Qualified, Reduced Growth Factor Basement Membrane Matrix	Thermo Fisher Scientific	12063569
Y-27632 (Dihydrochloride)	StemCell Technologies	72304
Corning® Cell Recovery Solution, 100 mL	Corning	354253
Invitrogen™ EDTA (0.5 M), pH 8.0, RNase-free	Thermo Fisher Scientific	62.554.502
Stellate Cell Growth Medium	iXCells Biotechnologies	MD-0014-500ML	601136
Sinusoidal Endothelial Growth Medium	Axol Bioscience	ax3778-1
EGM-2 Endothelial Cell Growth Medium-2 BulletKitTM	Lonza	CC-3162
DMEM/F-12, GlutaMAX™ supplement	Thermo Fisher Scientific	31331-093
Essential 8™ Medium	Thermo Fisher Scientific	A1517001
mTeSR™1 cGMP, feeder-free maintenance medium for human ES and iPS cells	StemCell Technologies	85850
Invitrogen™ EDTA (0.5 M), pH 8.0, RNase-free	Thermo Fisher Scientific	62.554.502
Bovine serum albumin (BSA)	VWR (SEQENS)	1035-30-100ML
Co-culture
Product	Source	Reference number	Lot number
Transwell Permeable Supports, 12mm Insert, 12 Well Plate, 0.4 uM Polyester membrane, Tissue culture treated, Polystyrene	Corning	3460	21121059
Gene expression
Product	Source	Reference number	Lot number
TaqMan probes
GAPDH	Thermo Fisher Scientific	Hs02786624_g1	P220930-010 F12
NGFR	Thermo Fisher Scientific	Hs00609976_m1	1949123
TAGLN	Thermo Fisher Scientific	Hs06633192_s1	P220110-004 B05
Igfbp3	Thermo Fisher Scientific	Hs00181211_m1	2007607
Rgs4	Thermo Fisher Scientific	Hs01111690_g1	1987932
ADAMTSL2	Thermo Fisher Scientific	Hs01115472_m1	1988572
Spon2	Thermo Fisher Scientific	Hs00202813_m1	2009316
Podn	Thermo Fisher Scientific	Hs00956648_m1	P211125-002
Rspo3	Thermo Fisher Scientific	Hs00262176_m1	1991220
COL1A1	Thermo Fisher Scientific	Hs00164004_m1	2066972
LOXL2	Thermo Fisher Scientific	Hs00158757_m1	2046370
ACTA2	Thermo Fisher Scientific	Hs00426835_g1	2059165
SMAD7	Thermo Fisher Scientific	Hs00998193_m1	2054458
TIMP1	Thermo Fisher Scientific	Hs01092512_g1	2058996
PDGFR-b	Thermo Fisher Scientific	Hs01019589_m1	2030657
ALCAM	Thermo Fisher Scientific	Hs00977641_m1	2050064
LRAT	Thermo Fisher Scientific	Hs00428109_m1	2040859
DES	Thermo Fisher Scientific	Hs00157258_m1	2066594
RELN	Thermo Fisher Scientific	Hs01022646_m1	P210215-003 C06
NCAM1	Thermo Fisher Scientific	Hs00941830_m1	2012159
POU5F1P3 (Oct3/4)	Thermo Fisher Scientific	Hs00999634_gH	P220407-003 H12
HES1	Thermo Fisher Scientific	Hs00172878_m1	2026255
HEY1	Thermo Fisher Scientific	Hs05047713_s1	1913166
JAG1	Thermo Fisher Scientific	HS01070032_m1	2061814
TBP	Thermo Fisher Scientific	Hs00427620_m1
LYVE1	Thermo Fisher Scientific	Hs00272659_m1
Kit	Thermo Fisher Scientific	Hs00174029_m1
Thbd	Thermo Fisher Scientific	Hs00264920_s1
Msr1	Thermo Fisher Scientific	Hs00234007_m1
Dll4	Thermo Fisher Scientific	Hs00184092_m1
Ntn4	Thermo Fisher Scientific	Hs00221915_m1
EPNB2	Thermo Fisher Scientific	Hs00187950_m1
Icam1	Thermo Fisher Scientific	Hs00164932_m1
Col5a2	Thermo Fisher Scientific	Hs00893878_m1
Fbn1	Thermo Fisher Scientific	Hs00171191_m1
Cdh13	Thermo Fisher Scientific	Hs01004530_m1
Ltbp4	Thermo Fisher Scientific	Hs00943217_m1
Pecam1	Thermo Fisher Scientific	Hs01065279_m1
F8	Thermo Fisher Scientific	Hs00252034_m1
Cd36	Thermo Fisher Scientific	Hs00354519_m1
qPCR material
TaqMan™ Gene Expression Master Mix	Thermo Fisher Scientific	10005754
MicroAmp™ Optical 384-Well Reaction Plate with Barcode	Thermo Fisher Scientific	4309849
Adhesive PCR Plate Seals	Thermo Fisher Scientific	AB0558
UltraPure™ DNase/RNase-Free Distilled Water	Thermo Fisher Scientific	10977049
Functional tests
Product	Source	Reference number	Lot number
Low Density Lipoprotein From Human Plasma, Acetylated, Alexa Fluor™ 488 Conjugate (Alexa Fluor™ 488 AcLDL)	Thermo Fisher Scientific	L23380
Escherichia coli (K-12 strain) BioParticles™, Alexa Fluor™ 594 conjugate	Thermo Fisher Scientific	E23370
Escherichia coli BioParticles™ Opsonizing Reagent	Thermo Fisher Scientific	E2870
Senescence Cells Histochemical Staining Kit	Sigma-Aldrich	CS0030-1KT	185517
Pierce™ BCA Protein Assay Kit	Thermo Fisher Scientific	23227	WF325507
RNA isolation and cDNA generation
Product	Source	Reference number	Lot number
TRIzol™ Reagent	Thermo Fisher Scientific	15596026
Glycogen, RNA grade	Thermo Fisher Scientific	R0551
Chloroform	Sigma-Aldrich	372978
Etanol, GPR RECTAPUR®	VWR	20824.296
Fisher Chemical 2.5LT Isopropanol, Molecular Biology Grade	Thermo Fisher Scientific	17150576
RNeasy Mini kit	Qiagen	74106
High-Capacity cDNA Reverse Transcription Kit	Thermo Fisher Scientific	4368813
Cell lines
Product	Source	Reference number	Lot number	Name in paper
Human Umbilical Vein Endothelial Cells (HUVEC)	Thermo Fisher Scientific	C0035C		HUVEC
Human Hepatic Stellate Cells- Adult (HHSC)	iXCells Biotechnologies	10HU-210	300076-2	pHSC
Primary Human Liver Sinusoidal Endothelial Cells (Mix Population)	Axol Bioscience	ax3777-1	ZMC	pLSEC
Liver-Derived Endothelial Cells, human, passage 2	Lonza	HLECP2		pHLEC
H1	WiCell Research Institute			sc_1
WTC-11	Coriell Institute for Medical Research			sc_2
WTSIi028-A	Wellcome Trust Sanger Institute			sc_3
WTSIi013-A	Wellcome Trust Sanger Institute			sc_4
ELISA and other reagents for the analysis
Product	Source	Reference number	Lot number
Procollagen type I C-peptide (PIP) detection	AH Diagnostics	MK101	ALG2025A
Wash and Stop Solution for ELISA without Sulfuric Acid	AH Diagnostics	MK021	AL33213A
Human FVIII ELISA kit (total FVIII antigen)	Abcam	ab272771
Nitric Oxide Assay Kit	Thermo Fisher Scientific	EMSNO	313476-001
Cell sorting
Product	Source	Reference number	Lot number
Dynabeads™ CD34 Positive Isolation Kit	11301D	Thermo fisher scientific
Hardware type
Product	Model	Company	Facility
Flow cytometer (HSC)	BD FACSMelodyTM Cell Sorter	BD biosciences	Flow Cytometry Core Facility at Oslo University Hospital, Gaustad
Flow cytometer (LSEC)	BD Accuri C6 plus	BD biosciences
Fluorescence microscope	Axioscope	Zeiss, Jena Germany
Confocal microscope	LSM700	Zeiss, Jena Germany	Norwegian Center for Stem Cell Research (core facility)
PCR plate machine	ViiA 7	Thermo fisher scientific
Plate reader	Wallac Victor2 1420 multilabel counter	Perkin Elmer/Wallac
Sorting magnet	Dynamag 15
Software
Product	Version	Company	Website
GraphPad Prism	9.3.1 for Windows		https://www.graphpad.com/
ImageJ	Java 8 (32-bit)		https://imagej.net/software/fiji/
ZEN Blue	3.5.093.00003	Carl Zeiss Microscopy GmbH	https://www.zeiss.com/microscopy/en/home.html
QuantStudio Real-Time PCR Software	1.7.2	Applied Biosystems by Thermo Fisher Scientific	https://www.thermofisher.com/no/en/home/global/forms/life-science/quantstudio-6-7-flex-software.html
Jupyter Notebook	2008-04-06
Python	2012-09-03
Foreada io	2022-04-12		https://floreada.io
BioRender			biorender.com
Morpheus			https://software.broadinstitute.org/morpheus
