# Supplementary material for: Characterization of human stem cell-derived hepatic stellate cells and liver sinusoidal endothelial cells during extended in vitro culture
Source: Front Bioeng Biotechnol. 2023 Jul 25;11:1223737. doi: 10.3389/fbioe.2023.1223737 (PMC10408301; doi:10.3389/fbioe.2023.1223737)
Supplement: Supplementary file 5 [file Table1.XLSX]

## Sheet: Table S1
Differentiations										Long-term culture
scHSC Differentiation					scLSEC Differentiation					HSC expansion medium
Day 0 of differentiation					Base medium						Composition	[Final]	Supplier (ref)
	Composition	Final concentration	Supplier (ref)			Composition	Final concentration	Supplier (ref)		Medium	DMEM/F-12 + Glutamax		Gibco (31331-093)
Medium	DMEM/F-12 + Glutamax		Gibco (31331-093)		Medium	IMDM	75% V/V	Gibco (12440061)		Suplements	MEM Non-Essential Amino Acids Solution	1X	Gibco (11140050)
Suplements	MEM Non-Essential Amino Acids Solution	1X	Gibco (11140050)			Stempro 34	25% V/V	Gibco (10639011)			Fetal Bovine Serum	1X	Gibco (26140079)
	B-27™ Supplement	1X	Gibco (17504044)		Suplements	Glutamax	0.01	Gibco (35050061)			Insulin-Transferrin-Selenium (ITS-G)	0,025X	Gibco (41400045)
Factors	Activin A	100 ng/mL	Peprotech (120-14P)			Transferrin	150µg/ml	Peprotech (10-366)			Dexamethasone	2,5 µM	Sigma-Aldrich (D4902-100 mg)
	CHIR	3 µM	Tocris (4423)			ITX	1:10 000	Gibco (41400045)			2-Phospho-L-ascorbic acid trisodium salt	100 µM	Sigma-Aldrich (49752)
	BMP-4	20 ng/mL	Peprotech (120-05)			P/S	0.01	Gibco (15070063)		Factors	Palimitic acid	100 µM	Sigma-Aldrich (P5585)
						L-Ascorbic acid 2 phosphate.	50µg/ml	Sigma Aldrich (A8960)			Retinol	5 µM	Sigma-Aldrich (R7632)
Day 1 of differentiation						1-alpha Thioglycerol	50µg/ml	Sigma Aldrich (M6145)		+/-	DAPT	5 µM	Tocris (2634)
	Composition	Final concentration	Supplier (ref)								TGF-β1	25 ng/mL	Abcam (ab50036)
Medium	DMEM/F-12 + Glutamax		Gibco (31331-093)		Factor suplementation
Suplements	MEM Non-Essential Amino Acids Solution	1X	Gibco (11140050)		Day 0					LSEC expansion medium
	B-27™ Supplement	1X	Gibco (17504044)		Factors	BMP-4	10 ng/mL	Peprotech (120-05)			Composition	Final concentration/dilution factor	Supplier
	Insulin-Transferrin-Selenium (ITS-G)	0,025X	Gibco (41400045)		Day 1					Medium	IMDM	75% V/V	Gibco (12440061)
	Dexamethasone	2,5 µM	Sigma-Aldrich (D4902-100 mg)		Factors	BMP-4	10 ng/mL	Peprotech (120-05)			Stempro 34	25% V/V	Gibco (10639011)
	2-Phospho-L-ascorbic acid trisodium salt	100 µM	Sigma-Aldrich (49752)			bFGF	5 ng/mL	Peprotech		Suplements	Glutamax	0.01	Gibco (35050061)
Factors	BMP-4	20 ng/mL	Peprotech (120-05)		Day 2						Transferrin	150µg/ml	Peprotech (10-366)
					Factors	BMP-4	10 ng/mL	Peprotech (120-05)			ITX	1:10 000	Gibco (41400045)
Day 3-5 of differentiation						bFGF	5 ng/mL	Peprotech			P/S	0.01	Gibco (15070063)
	Composition	Final concentration	Supplier (ref)			CHIR	3 µM	Biotechne?			L-Ascorbic acid 2 phosphate.	50µg/ml	Sigma Aldrich (A8960)
Medium	DMEM/F-12 + Glutamax		Gibco (31331-093)		Day 4-6						1-alpha Thioglycerol	50µg/ml	Sigma Aldrich (M6145)
Suplements	MEM Non-Essential Amino Acids Solution	1X	Gibco (11140050)		Factors	bFGF	30ng/mL	Peprotech		Factors	bFGF	30ng/mL
	B-27™ Supplement	1X	Gibco (17504044)			VEGFA 165	10ng/ml	Peprotech			VEGFA 165	10ng/ml	Peprotech
	Insulin-Transferrin-Selenium (ITS-G)	0,025X	Gibco (41400045)			DAPT	10µM	R&D systems?		+/-	DAPT	5 µM	Tocris (2634)
	Dexamethasone	2,5 µM	Sigma-Aldrich (D4902-100 mg)		Expansion medium
	2-Phospho-L-ascorbic acid trisodium salt	100 µM	Sigma-Aldrich (49752)		Factors	bFGF	30ng/mL	Peprotech		Co-Culture Medium (sc-HSCs and sc-LSECs)
Factors	BMP-4	20 ng/mL	Peprotech (120-05)			VEGFA 165	10ng/ml	Peprotech			Composition	[Final]	Supplier (ref)
	FGF-1	20 ng/mL	Peprotech (100-17A)		Specification medium (5 days)					Medium	DMEM/F-12 + Glutamax		Gibco (31331-093)
	FGF-3	20 ng/mL	R&D Systems (1206-F3-025)		Factors	bFGF	30ng/mL	Peprotech		Suplements	MEM Non-Essential Amino Acids Solution	1X	Gibco (11140050)
						8-Br-cAMP	1mM	Biolog			Fetal Bovine Serum	1X	Gibco (26140079)
Day 6-12 of differentiation						SB431921	6µM	Sigma-Aldrich			Insulin-Transferrin-Selenium (ITS-G)	0,025X	Gibco (41400045)
	Composition	Final concentration	Supplier (ref)								2-Phospho-L-ascorbic acid trisodium salt	100 µM	Sigma-Aldrich (49752)
Medium	DMEM/F-12 + Glutamax		Gibco (31331-093)							Factors	Palimitic acid	100 µM	Sigma-Aldrich (P5585)
Suplements	MEM Non-Essential Amino Acids Solution	1X	Gibco (11140050)								Retinol	5 µM	Sigma-Aldrich (R7632)
	Fetal Bovine Serum	1X	Gibco (26140079)								VEGFA 165	10 ng/mL	Peprotech (AF-100-20)
	Insulin-Transferrin-Selenium (ITS-G)	0,025X	Gibco (41400045)								bFGF	30 ng/mL	Peprotech (AF-100-18B)
	Dexamethasone	2,5 µM	Sigma-Aldrich (D4902-100 mg)							+/-	TGF-β1	25 ng/mL	Abcam (ab50036)
	2-Phospho-L-ascorbic acid trisodium salt	100 µM	Sigma-Aldrich (49752)
Factors	FGF-1	20 ng/mL	Peprotech (100-17A)
	FGF-3	20 ng/mL	R&D Systems (1206-F3-025)
	Palimitic acid	100 µM	Sigma-Aldrich (P5585)
	Retinol	5 µM	Sigma-Aldrich (R7632)
From day 12 of differentiation - HSC expansion medium
	Composition	Final concentration	Supplier (ref)
Medium	DMEM/F-12 + Glutamax		Gibco (31331-093)
Suplements	MEM Non-Essential Amino Acids Solution	1X	Gibco (11140050)
	Fetal Bovine Serum	1X	Gibco (26140079)
	Insulin-Transferrin-Selenium (ITS-G)	0,025X	Gibco (41400045)
	Dexamethasone	2,5 µM	Sigma-Aldrich (D4902-100 mg)
	2-Phospho-L-ascorbic acid trisodium salt	100 µM	Sigma-Aldrich (49752)
Factors	Palimitic acid	100 µM	Sigma-Aldrich (P5585)
	Retinol	5 µM	Sigma-Aldrich (R7632)
